# Supplementary material for: MicroRNAs in Salivary Exosome as Potential Biomarkers of Aging
Source: PubMed Central journal article supplement (PMC4613253; doi:10.3390/ijms160921294), 2015-09-07
Supplement: ijms-16-21294-s001.pdf [file ijms-16-21294-s001.pdf]

## Supplementary Information

**Table S1.** List of commonly detected miRNAs in young and old groups using microarray.

| miRNA Name   | miRBase Mature<br>miRNA ID | Signal Intensity * |           | FC † | Entry of DIANA Database ‡ |
|--------------|----------------------------|--------------------|-----------|------|---------------------------|
|              |                            | Young Group        | Old Group |      |                           |
| miR-24-3p    | MIMAT0000080               | 5.83               | 25.75     | 4.42 | Entried                   |
| miR-198      | MIMAT0000228               | 11.77              | 13.24     | 1.13 | Entried                   |
| miR-203a     | MIMAT0000264               | 21.48              | 11.73     | 0.55 | Not entried               |
| miR-124-3p   | MIMAT0000422               | 6.12               | 11.43     | 1.87 | Entried                   |
| miR-370-3p   | MIMAT0000722               | 8.31               | 7.21      | 0.87 | Not entried               |
| miR-491-5p   | MIMAT0002807               | 5.32               | 6.19      | 1.16 | Entried                   |
| miR-638      | MIMAT0003308               | 234.16             | 96.25     | 0.41 | Entried                   |
| miR-663a     | MIMAT0003326               | 94.41              | 60.46     | 0.64 | Entried                   |
| miR-658      | MIMAT0003336               | 4.64               | 9.16      | 1.97 | Entried                   |
| miR-671-5p   | MIMAT0003880               | 9.68               | 21.63     | 2.23 | Entried                   |
| miR-30c-2-3p | MIMAT0004550               | 6.63               | 5.00      | 0.75 | Entried                   |
| miR-149-3p   | MIMAT0004609               | 52.07              | 51.31     | 0.99 | Entried                   |
| miR-371a-5p  | MIMAT0004687               | 4.79               | 17.15     | 3.58 | Entried                   |
| miR-92b-5p   | MIMAT0004792               | 12.79              | 19.52     | 1.53 | Entried                   |
| miR-551b-5p  | MIMAT0004794               | 197.93             | 213.40    | 1.08 | Entried                   |
| miR-744-5p   | MIMAT0004945               | 8.28               | 7.36      | 0.89 | Entried                   |
| miR-920      | MIMAT0004970               | 67.52              | 55.91     | 0.83 | Entried                   |
| miR-939-5p   | MIMAT0004982               | 121.49             | 53.73     | 0.44 | Not entried               |
| miR-1224-5p  | MIMAT0005458               | 8.49               | 12.40     | 1.46 | Entried                   |
| miR-1228-5p  | MIMAT0005582               | 63.94              | 46.61     | 0.73 | Entried                   |
| miR-1290     | MIMAT0005880               | 58.36              | 32.52     | 0.56 | Entried                   |
| miR-1246     | MIMAT0005898               | 152.10             | 121.90    | 0.80 | Entried                   |
| miR-1254     | MIMAT0005905               | 174.89             | 54.34     | 0.31 | Entried                   |
| miR-1268a    | MIMAT0005922               | 55.69              | 46.80     | 0.84 | Entried                   |
| miR-1469     | MIMAT0007347               | 18.37              | 37.67     | 2.05 | Entried                   |
| miR-1908-5p  | MIMAT0007881               | 153.55             | 69.99     | 0.46 | Not entried               |
| miR-1914-3p  | MIMAT0007890               | 17.35              | 22.87     | 1.32 | Entried                   |
| miR-1915-3p  | MIMAT0007892               | 40.16              | 20.52     | 0.51 | Entried                   |
| miR-365a-5p  | MIMAT0009199               | 4.79               | 17.72     | 3.70 | Entried                   |
| miR-762      | MIMAT0010313               | 143.41             | 112.38    | 0.78 | Entried                   |
| miR-711      | MIMAT0012734               | 33.87              | 19.51     | 0.58 | Entried                   |

Table S1. *Cont*

| miRNA Name  | miRBase Mature<br>miRNA ID | Signal Intensity * |           | FC † | Entry of DIANA Database ‡ |
|-------------|----------------------------|--------------------|-----------|------|---------------------------|
|             |                            | Young Group        | Old Group |      |                           |
| miR-2861    | MIMAT0013802               | 162.58             | 102.04    | 0.63 | Entried                   |
| miR-3131    | MIMAT0014996               | 113.90             | 57.53     | 0.51 | Entried                   |
| miR-3162-5p | MIMAT0015036               | 4.89               | 15.22     | 3.11 | Entried                   |
| miR-1193    | MIMAT0015049               | 9.83               | 5.96      | 0.61 | Entried                   |
| miR-3175    | MIMAT0015052               | 5.42               | 17.03     | 3.14 | Entried                   |
| miR-3178    | MIMAT0015055               | 47.61              | 58.71     | 1.23 | Entried                   |
| miR-3180-3p | MIMAT0015058               | 46.94              | 19.93     | 0.42 | Entried                   |
| miR-3185    | MIMAT0015065               | 13.74              | 14.01     | 1.02 | Entried                   |
| miR-3188    | MIMAT0015070               | 9.33               | 13.10     | 1.40 | Entried                   |
| miR-3196    | MIMAT0015080               | 127.15             | 70.48     | 0.55 | Entried                   |
| miR-3197    | MIMAT0015082               | 56.01              | 60.75     | 1.08 | Entried                   |
| miR-4294    | MIMAT0016849               | 33.38              | 61.49     | 1.84 | Entried                   |
| miR-4299    | MIMAT0016851               | 7.18               | 12.46     | 1.74 | Entried                   |
| miR-4257    | MIMAT0016878               | 24.67              | 21.44     | 0.87 | Entried                   |
| miR-4260    | MIMAT0016881               | 28.01              | 39.75     | 1.42 | Entried                   |
| miR-4327    | MIMAT0016889               | 12.98              | 16.62     | 1.28 | Entried                   |
| miR-4270    | MIMAT0016900               | 17.37              | 23.53     | 1.35 | Entried                   |
| miR-4271    | MIMAT0016901               | 27.57              | 36.25     | 1.31 | Entried                   |
| miR-4281    | MIMAT0016907               | 53.49              | 50.30     | 0.94 | Entried                   |
| miR-3610    | MIMAT0017987               | 9.80               | 31.16     | 3.18 | Entried                   |
| miR-3621    | MIMAT0018002               | 80.58              | 85.70     | 1.06 | Entried                   |
| miR-3648    | MIMAT0018068               | 678.78             | 359.98    | 0.53 | Entried                   |
| miR-3652    | MIMAT0018072               | 7.86               | 7.08      | 0.90 | Entried                   |
| miR-3656    | MIMAT0018076               | 130.15             | 75.00     | 0.58 | Entried                   |
| miR-1273e   | MIMAT0018079               | 7.34               | 1.41      | 0.19 | Entried                   |
| miR-3665    | MIMAT0018087               | 338.65             | 165.65    | 0.49 | Entried                   |
| miR-3679-5p | MIMAT0018104               | 13.91              | 25.30     | 1.82 | Entried                   |
| miR-3180    | MIMAT0018178               | 34.50              | 17.74     | 0.51 | Entried                   |
| miR-3928-3p | MIMAT0018205               | 159.38             | 70.84     | 0.44 | Not entried               |
| miR-3937    | MIMAT0018352               | 18.90              | 15.96     | 0.84 | Entried                   |
| miR-642b-3p | MIMAT0018444               | 14.90              | 31.59     | 2.12 | Entried                   |
| miR-1268b   | MIMAT0018925               | 38.62              | 34.34     | 0.89 | Entried                   |
| miR-4428    | MIMAT0018943               | 5.88               | 11.82     | 2.01 | Entried                   |
| miR-4429    | MIMAT0018944               | 5.44               | 4.31      | 0.79 | Entried                   |
| miR-4430    | MIMAT0018945               | 7.53               | 7.86      | 1.04 | Entried                   |
| miR-4442    | MIMAT0018960               | 86.44              | 77.15     | 0.89 | Entried                   |
| miR-4454    | MIMAT0018976               | 25.84              | 15.86     | 0.61 | Entried                   |
| miR-4459    | MIMAT0018981               | 61.24              | 69.56     | 1.14 | Entried                   |
| miR-3135b   | MIMAT0018985               | 6.94               | 8.49      | 1.22 | Entried                   |
| miR-4463    | MIMAT0018987               | 51.58              | 53.32     | 1.03 | Entried                   |
| miR-4466    | MIMAT0018993               | 168.70             | 121.62    | 0.72 | Entried                   |
| miR-4467    | MIMAT0018994               | 201.04             | 54.96     | 0.27 | Entried                   |
| miR-4478    | MIMAT0019006               | 8.74               | 5.48      | 0.63 | Entried                   |

Table S1. Cont

| miRNA Name  | miRBase Mature<br>miRNA ID | Signal Intensity * |           | FC † | Entry of DIANA Database ‡ |
|-------------|----------------------------|--------------------|-----------|------|---------------------------|
|             |                            | Young Group        | Old Group |      |                           |
| miR-4484    | MIMAT0019018               | 381.51             | 252.60    | 0.66 | Entried                   |
| miR-4486    | MIMAT0019020               | 17.40              | 6.62      | 0.38 | Entried                   |
| miR-4488    | MIMAT0019022               | 236.24             | 123.14    | 0.52 | Entried                   |
| miR-4492    | MIMAT0019027               | 19.40              | 14.00     | 0.72 | Entried                   |
| miR-4497    | MIMAT0019032               | 68.55              | 100.48    | 1.47 | Entried                   |
| miR-4419b   | MIMAT0019034               | 46.49              | 27.04     | 0.58 | Entried                   |
| miR-4505    | MIMAT0019041               | 45.57              | 22.99     | 0.50 | Entried                   |
| miR-4508    | MIMAT0019045               | 188.24             | 104.93    | 0.56 | Entried                   |
| miR-4513    | MIMAT0019050               | 14.21              | 9.41      | 0.66 | Entried                   |
| miR-4516    | MIMAT0019053               | 211.72             | 175.83    | 0.83 | Entried                   |
| miR-4530    | MIMAT0019069               | 131.63             | 189.67    | 1.44 | Entried                   |
| miR-4532    | MIMAT0019071               | 15.71              | 23.54     | 1.50 | Entried                   |
| miR-4534    | MIMAT0019073               | 15.85              | 54.83     | 3.46 | Entried                   |
| miR-3619-3p | MIMAT0019219               | 19.08              | 21.26     | 1.11 | Entried                   |
| miR-3940-5p | MIMAT0019229               | 104.79             | 54.20     | 0.52 | Entried                   |
| miR-3960    | MIMAT0019337               | 707.86             | 424.37    | 0.60 | Entried                   |
| miR-4646-5p | MIMAT0019707               | 6.33               | 4.72      | 0.75 | Entried                   |
| miR-4649-5p | MIMAT0019711               | 8.49               | 11.79     | 1.39 | Entried                   |
| miR-4651    | MIMAT0019715               | 34.71              | 33.69     | 0.97 | Entried                   |
| miR-4655-5p | MIMAT0019721               | 33.67              | 37.05     | 1.10 | Entried                   |
| miR-4656    | MIMAT0019723               | 19.96              | 15.11     | 0.76 | Entried                   |
| miR-4665-5p | MIMAT0019739               | 23.20              | 20.91     | 0.90 | Entried                   |
| miR-4667-5p | MIMAT0019743               | 83.96              | 34.46     | 0.41 | Entried                   |
| miR-4674    | MIMAT0019756               | 5.64               | 9.37      | 1.66 | Entried                   |
| miR-4687-3p | MIMAT0019775               | 19.69              | 30.01     | 1.52 | Entried                   |
| miR-1343-3p | MIMAT0019776               | 4.93               | 28.38     | 5.75 | Not entried               |
| miR-4688    | MIMAT0019777               | 32.73              | 56.91     | 1.74 | Entried                   |
| miR-4689    | MIMAT0019778               | 56.81              | 97.87     | 1.72 | Entried                   |
| miR-4695-5p | MIMAT0019788               | 65.79              | 54.50     | 0.83 | Entried                   |
| miR-4706    | MIMAT0019806               | 13.00              | 28.49     | 2.19 | Entried                   |
| miR-4722-5p | MIMAT0019836               | 14.08              | 39.47     | 2.80 | Entried                   |
| miR-4723-5p | MIMAT0019838               | 988.71             | 678.22    | 0.69 | Entried                   |
| miR-4725-3p | MIMAT0019844               | 6.15               | 30.84     | 5.02 | Entried                   |
| miR-4726-5p | MIMAT0019845               | 27.18              | 23.29     | 0.86 | Entried                   |
| miR-4728-5p | MIMAT0019849               | 36.39              | 27.01     | 0.74 | Entried                   |
| miR-4730    | MIMAT0019852               | 38.17              | 49.19     | 1.29 | Entried                   |
| miR-4732-5p | MIMAT0019855               | 33.59              | 24.51     | 0.73 | Entried                   |
| miR-4734    | MIMAT0019859               | 107.17             | 46.72     | 0.44 | Entried                   |
| miR-4739    | MIMAT0019868               | 94.52              | 111.66    | 1.18 | Entried                   |
| miR-4740-3p | MIMAT0019870               | 50.38              | 23.14     | 0.46 | Entried                   |
| miR-4741    | MIMAT0019871               | 37.18              | 36.45     | 0.98 | Entried                   |
| miR-4745-5p | MIMAT0019878               | 26.82              | 26.82     | 1.00 | Entried                   |
| miR-4749-5p | MIMAT0019885               | 25.25              | 20.09     | 0.80 | Entried                   |

Table S1. *Cont*

| miRNA Name  | miRBase Mature<br>miRNA ID | Signal Intensity * |           | FC † | Entry of DIANA Database ‡ |
|-------------|----------------------------|--------------------|-----------|------|---------------------------|
|             |                            | Young Group        | Old Group |      |                           |
| miR-4751    | MIMAT0019888               | 10.84              | 9.77      | 0.90 | Entried                   |
| miR-4758-5p | MIMAT0019903               | 15.26              | 13.84     | 0.91 | Entried                   |
| miR-4763-3p | MIMAT0019913               | 27.38              | 21.23     | 0.78 | Entried                   |
| miR-4787-5p | MIMAT0019956               | 308.93             | 152.58    | 0.49 | Entried                   |
| miR-642a-3p | MIMAT0020924               | 18.97              | 33.49     | 1.77 | Entried                   |
| miR-5001-5p | MIMAT0021021               | 70.82              | 50.09     | 0.71 | Entried                   |
| miR-5008-5p | MIMAT0021039               | 21.16              | 39.22     | 1.85 | Entried                   |
| miR-197-5p  | MIMAT0022691               | 74.11              | 73.38     | 0.99 | Entried                   |
| miR-204-3p  | MIMAT0022693               | 139.17             | 267.37    | 1.92 | Entried                   |
| miR-211-3p  | MIMAT0022694               | 8.04               | 7.62      | 0.95 | Entried                   |
| miR-345-3p  | MIMAT0022698               | 5.08               | 7.47      | 1.47 | Entried                   |
| miR-1227-5p | MIMAT0022941               | 37.98              | 24.86     | 0.65 | Not entried               |
| miR-1229-5p | MIMAT0022942               | 20.64              | 25.31     | 1.23 | Not entried               |
| miR-1233-5p | MIMAT0022943               | 532.98             | 766.18    | 1.44 | Not entried               |
| miR-1237-5p | MIMAT0022946               | 172.81             | 143.85    | 0.83 | Not entried               |
| miR-1238-5p | MIMAT0022947               | 19.32              | 40.70     | 2.11 | Not entried               |
| miR-4632-5p | MIMAT0022977               | 22.00              | 24.63     | 1.12 | Not entried               |
| miR-5739    | MIMAT0023116               | 20.52              | 16.37     | 0.80 | Not entried               |
| miR-5787    | MIMAT0023252               | 241.70             | 273.71    | 1.13 | Not entried               |
| miR-6075    | MIMAT0023700               | 50.25              | 13.46     | 0.27 | Not entried               |
| miR-6076    | MIMAT0023701               | 14.44              | 32.78     | 2.27 | Not entried               |
| miR-6085    | MIMAT0023710               | 187.28             | 140.96    | 0.75 | Not entried               |
| miR-6087    | MIMAT0023712               | 97.21              | 64.03     | 0.66 | Not entried               |
| miR-6088    | MIMAT0023713               | 32.42              | 32.43     | 1.00 | Not entried               |
| miR-6089    | MIMAT0023714               | 380.64             | 243.43    | 0.64 | Not entried               |
| miR-6090    | MIMAT0023715               | 298.99             | 192.58    | 0.64 | Not entried               |
| miR-6124    | MIMAT0024597               | 8.21               | 21.22     | 2.58 | Not entried               |
| miR-6125    | MIMAT0024598               | 360.58             | 231.97    | 0.64 | Not entried               |
| miR-6126    | MIMAT0024599               | 170.06             | 106.28    | 0.62 | Not entried               |
| miR-6127    | MIMAT0024610               | 15.54              | 4.37      | 0.28 | Not entried               |
| miR-6131    | MIMAT0024615               | 20.12              | 55.31     | 2.75 | Not entried               |
| miR-6132    | MIMAT0024616               | 12.55              | 10.01     | 0.80 | Not entried               |
| miR-6165    | MIMAT0024782               | 5.00               | 8.52      | 1.71 | Not entried               |
| miR-6721-5p | MIMAT0025852               | 8.75               | 13.43     | 1.54 | Not entried               |
| miR-6722-3p | MIMAT0025854               | 17.69              | 16.88     | 0.95 | Not entried               |
| miR-6724-5p | MIMAT0025856               | 46.75              | 19.67     | 0.42 | Not entried               |
| miR-328-5p  | MIMAT0026486               | 72.67              | 94.63     | 1.30 | Not entried               |
| miR-1343-5p | MIMAT0027038               | 49.66              | 48.68     | 0.98 | Not entried               |
| miR-6726-5p | MIMAT0027353               | 13.55              | 27.34     | 2.02 | Not entried               |
| miR-6727-5p | MIMAT0027355               | 157.20             | 93.40     | 0.59 | Not entried               |
| miR-6728-5p | MIMAT0027357               | 14.28              | 20.86     | 1.46 | Not entried               |
| miR-6729-5p | MIMAT0027359               | 203.77             | 95.27     | 0.47 | Not entried               |
| miR-6732-5p | MIMAT0027365               | 12.77              | 10.59     | 0.83 | Not entried               |

Table S1. *Cont*

| miRNA Name   | miRBase Mature<br>miRNA ID | Signal Intensity * |           | FC † | Entry of DIANA Database ‡ |
|--------------|----------------------------|--------------------|-----------|------|---------------------------|
|              |                            | Young Group        | Old Group |      |                           |
| miR-6738-5p  | MIMAT0027377               | 7.56               | 13.39     | 1.77 | Not entried               |
| miR-6741-5p  | MIMAT0027383               | 24.43              | 24.56     | 1.01 | Not entried               |
| miR-6743-5p  | MIMAT0027387               | 50.25              | 77.23     | 1.54 | Not entried               |
| miR-6746-5p  | MIMAT0027392               | 136.80             | 122.13    | 0.89 | Not entried               |
| miR-6749-5p  | MIMAT0027398               | 41.75              | 44.24     | 1.06 | Not entried               |
| miR-6752-5p  | MIMAT0027404               | 56.38              | 88.99     | 1.58 | Not entried               |
| miR-6756-5p  | MIMAT0027412               | 38.02              | 48.97     | 1.29 | Not entried               |
| miR-6757-5p  | MIMAT0027414               | 91.65              | 125.45    | 1.37 | Not entried               |
| miR-6760-5p  | MIMAT0027420               | 70.69              | 75.07     | 1.06 | Not entried               |
| miR-6763-5p  | MIMAT0027426               | 5.37               | 7.51      | 1.40 | Not entried               |
| miR-6765-5p  | MIMAT0027430               | 35.27              | 28.00     | 0.79 | Not entried               |
| miR-6767-5p  | MIMAT0027434               | 6.06               | 6.87      | 1.13 | Not entried               |
| miR-6768-5p  | MIMAT0027436               | 6.39               | 18.48     | 2.89 | Not entried               |
| miR-6769a-5p | MIMAT0027438               | 79.16              | 56.10     | 0.71 | Not entried               |
| miR-6771-5p  | MIMAT0027442               | 38.75              | 49.97     | 1.29 | Not entried               |
| miR-6772-5p  | MIMAT0027444               | 29.86              | 15.68     | 0.53 | Not entried               |
| miR-6774-5p  | MIMAT0027448               | 22.92              | 53.93     | 2.35 | Not entried               |
| miR-6775-5p  | MIMAT0027450               | 17.57              | 28.32     | 1.61 | Not entried               |
| miR-6777-5p  | MIMAT0027454               | 14.44              | 10.26     | 0.71 | Not entried               |
| miR-6778-5p  | MIMAT0027456               | 42.64              | 30.54     | 0.72 | Not entried               |
| miR-6779-5p  | MIMAT0027458               | 10.58              | 24.52     | 2.32 | Not entried               |
| miR-6781-5p  | MIMAT0027462               | 54.67              | 40.39     | 0.74 | Not entried               |
| miR-6782-5p  | MIMAT0027464               | 8.30               | 14.81     | 1.78 | Not entried               |
| miR-6784-5p  | MIMAT0027468               | 62.34              | 62.27     | 1.00 | Not entried               |
| miR-6785-5p  | MIMAT0027470               | 16.72              | 29.38     | 1.76 | Not entried               |
| miR-6786-5p  | MIMAT0027472               | 242.26             | 137.41    | 0.57 | Not entried               |
| miR-6787-5p  | MIMAT0027474               | 77.35              | 57.99     | 0.75 | Not entried               |
| miR-6789-5p  | MIMAT0027478               | 9.33               | 10.99     | 1.18 | Not entried               |
| miR-6791-5p  | MIMAT0027482               | 77.60              | 32.82     | 0.42 | Not entried               |
| miR-6794-5p  | MIMAT0027488               | 14.45              | 17.40     | 1.20 | Not entried               |
| miR-6798-5p  | MIMAT0027496               | 30.92              | 46.08     | 1.49 | Not entried               |
| miR-6799-5p  | MIMAT0027498               | 9.81               | 18.46     | 1.88 | Not entried               |
| miR-6800-5p  | MIMAT0027500               | 4.65               | 14.14     | 3.04 | Not entried               |
| miR-6802-5p  | MIMAT0027504               | 21.82              | 69.40     | 3.18 | Not entried               |
| miR-6803-5p  | MIMAT0027506               | 54.54              | 42.30     | 0.78 | Not entried               |
| miR-6805-5p  | MIMAT0027510               | 79.35              | 50.59     | 0.64 | Not entried               |
| miR-6808-5p  | MIMAT0027516               | 10.84              | 22.13     | 2.04 | Not entried               |
| miR-6809-5p  | MIMAT0027518               | 4.89               | 17.84     | 3.65 | Not entried               |
| miR-6812-5p  | MIMAT0027524               | 23.97              | 36.31     | 1.51 | Not entried               |
| miR-6816-5p  | MIMAT0027532               | 21.94              | 16.13     | 0.73 | Not entried               |
| miR-6819-5p  | MIMAT0027538               | 23.17              | 25.37     | 1.10 | Not entried               |
| miR-6820-5p  | MIMAT0027540               | 21.43              | 17.29     | 0.81 | Not entried               |
| miR-6821-5p  | MIMAT0027542               | 33.61              | 26.65     | 0.79 | Not entried               |

Table S1. *Cont*

| miRNA Name   | miRBase Mature<br>miRNA ID | Signal Intensity * |           | FC † | Entry of DIANA Database ‡ |
|--------------|----------------------------|--------------------|-----------|------|---------------------------|
|              |                            | Young Group        | Old Group |      |                           |
| miR-6824-5p  | MIMAT0027548               | 6.65               | 23.45     | 3.52 | Not entried               |
| miR-6828-5p  | MIMAT0027556               | 42.69              | 14.26     | 0.33 | Not entried               |
| miR-6829-5p  | MIMAT0027558               | 5.06               | 8.38      | 1.66 | Not entried               |
| miR-6780b-5p | MIMAT0027572               | 65.74              | 77.54     | 1.18 | Not entried               |
| miR-6840-3p  | MIMAT0027583               | 6.85               | 9.82      | 1.43 | Not entried               |
| miR-6845-5p  | MIMAT0027590               | 47.53              | 28.04     | 0.59 | Not entried               |
| miR-6849-5p  | MIMAT0027598               | 116.66             | 141.13    | 1.21 | Not entried               |
| miR-6850-5p  | MIMAT0027600               | 82.84              | 58.68     | 0.71 | Not entried               |
| miR-6858-5p  | MIMAT0027616               | 13.18              | 16.47     | 1.25 | Not entried               |
| miR-6859-5p  | MIMAT0027618               | 31.62              | 10.56     | 0.33 | Not entried               |
| miR-6769b-5p | MIMAT0027620               | 8.19               | 14.89     | 1.82 | Not entried               |
| miR-6861-5p  | MIMAT0027623               | 24.75              | 18.70     | 0.76 | Not entried               |
| miR-6869-5p  | MIMAT0027638               | 163.77             | 104.85    | 0.64 | Not entried               |
| miR-6873-5p  | MIMAT0027646               | 6.14               | 4.26      | 0.69 | Not entried               |
| miR-6875-5p  | MIMAT0027650               | 7.20               | 25.59     | 3.55 | Not entried               |
| miR-6877-5p  | MIMAT0027654               | 17.15              | 16.82     | 0.98 | Not entried               |
| miR-6879-5p  | MIMAT0027658               | 27.18              | 42.68     | 1.57 | Not entried               |
| miR-6885-5p  | MIMAT0027670               | 19.22              | 30.80     | 1.60 | Not entried               |
| miR-6889-5p  | MIMAT0027678               | 7.67               | 7.61      | 0.99 | Not entried               |
| miR-6891-5p  | MIMAT0027682               | 5.26               | 21.45     | 4.08 | Not entried               |
| miR-6893-5p  | MIMAT0027686               | 31.72              | 32.23     | 1.02 | Not entried               |
| miR-7106-5p  | MIMAT0028109               | 7.46               | 34.93     | 4.68 | Not entried               |
| miR-7107-5p  | MIMAT0028111               | 19.69              | 22.37     | 1.14 | Not entried               |
| miR-7108-5p  | MIMAT0028113               | 75.85              | 18.29     | 0.24 | Not entried               |
| miR-7109-5p  | MIMAT0028115               | 23.41              | 36.03     | 1.54 | Not entried               |
| miR-7111-5p  | MIMAT0028119               | 12.02              | 25.92     | 2.16 | Not entried               |
| miR-7150     | MIMAT0028211               | 6.62               | 20.65     | 3.12 | Not entried               |
| miR-7641     | MIMAT0029782               | 13.13              | 26.83     | 2.04 | Not entried               |
| miR-7704     | MIMAT0030019               | 254.84             | 264.86    | 1.04 | Not entried               |
| miR-4433b-3p | MIMAT0030414               | 5.69               | 11.31     | 1.99 | Not entried               |
| miR-7846-3p  | MIMAT0030421               | 23.28              | 11.49     | 0.49 | Not entried               |
| miR-7847-3p  | MIMAT0030422               | 8.38               | 17.47     | 2.08 | Not entried               |
| miR-8059     | MIMAT0030986               | 5.54               | 18.68     | 3.37 | Not entried               |
| miR-8060     | MIMAT0030987               | 13.41              | 20.93     | 1.56 | Not entried               |
| miR-8069     | MIMAT0030996               | 197.54             | 82.31     | 0.42 | Not entried               |
| miR-8071     | MIMAT0030998               | 16.01              | 10.84     | 0.68 | Not entried               |
| miR-8072     | MIMAT0030999               | 350.39             | 213.48    | 0.61 | Not entried               |
| miR-8073     | MIMAT0031000               | 5.91               | 11.51     | 1.95 | Not entried               |
| miR-128-2-5p | MIMAT0031095               | 21.53              | 45.64     | 2.12 | Not entried               |

\* Signal intensities were calculated by global normalization (ratio median = 1) method; † Fold change of miRNAs for old group using young group as reference; ‡ We used DIANA miRPath v.2.0. DIANA database were referring to miRBase 18. FC: fold change.

**Table S2.** NOD value of miRNAs and list of unique target genes.

| <b>miRNA Name</b> | <b>NOD *</b> | <b>Unique Target Genes</b>                                                                                                                                    |
|-------------------|--------------|---------------------------------------------------------------------------------------------------------------------------------------------------------------|
| miR-124-3p        | 22           | <i>LRP6, ROCK1, VANGL1, CCND2, ROCK2, FZD4, SMAD4, NFATC1, MAPK10, GNAI3, GRIA2, RYR1, PTPN1, LIPE, RHOQ, GYS1, MAPK14, WASF1, MYH10, IQGAP1, DIAPH1, PGF</i> |
| miR-4739          | 20           | <i>FGF6, ITGA8, FGF23, VAV3, IL2RG, TNFRSF11A, CNTFR, TNFSF13B, CXCL5, CCL11, IL22RA1, IL6R, ATP6AP1, AP4E1, GM2A, CTSO, ATP6V0B, AP1S1, AP1G1, GLBI</i>      |
| miR-371a-5p       | 15           | <i>PSEN1, LEF1, NAA38, CID, DCP2, BTG3, PABPC5, CRNKL1, CDC40, SRSF2, SRSF7, SRSF6, AQR, SRSF3, WBP11</i>                                                     |
| miR-4530          | 13           | <i>TAOK3, CACNG8, CRK, MST1, RASA1, JMJD7-PLA2G4B, NTRK1, MEF2C, FGFRI, PSEN2, SLC9A1, ATP1A4, ATP2A2</i>                                                     |
| miR-4728-5p       | 13           | <i>RASA2, MAP2K7, MAP3K2, RRAS, PARVG, SHC1, ZYX, RHOA, ITGA11, PIK3R3, COL11A2, FLT4, COL5A3</i>                                                             |
| miR-4763-3p       | 13           | <i>MAP3K11, MAP2K6, FGF18, JUND, MAPK8IP3, PPM1B, CACNA2D1, TGFB2, PTK2B, PDE1B, PHKA1, SPHK2, LIFR</i>                                                       |
| miR-24-3p         | 12           | <i>MYC, TCF7, IL1R1, TAB2, FASLG, TAOK1, FGF11, HSPA8, IL1A, SRF, RAP1B, CRH</i>                                                                              |
| miR-4429          | 12           | <i>KRAS, PRKCB, TSC1, PDK1, PRKAB2, AKT3, YWHAE, RAC1, ITGA1, PPP1R12A, PTEN, XIAP</i>                                                                        |
| miR-204-3p        | 10           | <i>CACNA1F, ERBB4, NMNAT1, ABCB9, GALNS, SUMF1, CD68, ARSG, CTSB, AP3S2</i>                                                                                   |
| miR-4459          | 10           | <i>DVL3, NFATC4, MAPK9, FZD1, COL24A1, ITGB6, COL6A6, COL3A1, COL1A2, COL4A6</i>                                                                              |
| miR-4516          | 8            | <i>FZD7, TCF4, PPP2R5C, CACNG6, ITGA9, FGD3, PIP4K2B, ARHGEF4</i>                                                                                             |
| miR-4651          | 8            | <i>FZD8, PRKCG, WNT7B, FGF17, PIK3R2, ARHGEF1, VAV1, LIMK1</i>                                                                                                |
| miR-762           | 8            | <i>TCF7L1, PLCB3, NFATC2, FOSL1, PPARD, PPP3R2, PTPN5, RPS6KA4</i>                                                                                            |
| miR-1290          | 7            | <i>GYS2, RIPK2, EGFR, PIP5K1B, ITGAV, SRC, CAPN2</i>                                                                                                          |
| miR-1915-3p       | 7            | <i>WNT2B, PPP2R5D, EP300, WNT3A, WNT9A, ADRA1B, VDAC3</i>                                                                                                     |
| miR-3679-5p       | 7            | <i>PRKAG1, PRKACB, PLCG1, ATP2B1, HTR5A, EDNRA, HTR2C</i>                                                                                                     |
| miR-4667-5p       | 7            | <i>RAF1, IRAK4, NGFR, EZR, ITGA5, ARHGEF6, ITGA7</i>                                                                                                          |
| miR-920           | 7            | <i>INHBB, IL2RB, EXOSC3, SKIV2L, PGAM4, PGAM1, PCK2</i>                                                                                                       |
| miR-149-3p        | 6            | <i>DUSP2, PFN1, SSH1, INSR, MYH14, NCKAP1L</i>                                                                                                                |
| miR-4478          | 6            | <i>IL12RB1, IL13, CCR5, TNFRSF10B, CXCL9, CTF1</i>                                                                                                            |
| miR-671-5p        | 6            | <i>CXCL14, CSF2RB, RELT, IL17RB, KIT, IL17A</i>                                                                                                               |
| miR-1224-5p       | 5            | <i>PPP2R5A, PRICKLE2, ATP6V1H, AP1S2, IGF2R</i>                                                                                                               |
| miR-3162-5p       | 5            | <i>FGF12, DUSP22, GADD45A, PPM1A, RASGRP4</i>                                                                                                                 |
| miR-4484          | 5            | <i>GNA11, CALM2, EIF4E, PAK7, ENAH</i>                                                                                                                        |

Table S2. Cont

| miRNA Name   | NOD * | Unique Target Genes                       |
|--------------|-------|-------------------------------------------|
| miR-491-5p   | 5     | <i>GNAS, LHCGR, ATP2B3, CACNA1D, HTR7</i> |
| miR-1246     | 4     | <i>PLCB4, PRLR, EDA, ACVR1</i>            |
| miR-30c-2-3p | 4     | <i>NAMPT, ATP1B2, SLC8A1, CACNB2</i>      |
| miR-3175     | 4     | <i>DAAM2, PABPC1L2B, PABPC1L2A, ENO2</i>  |
| miR-3188     | 4     | <i>AGT, ADH1B, GPI, CEL</i>               |
| miR-3619-3p  | 4     | <i>CCL4L2, CCL4L1, CCL4, FCGR2B</i>       |
| miR-4726-5p  | 4     | <i>CYSLTR2, ITPR2, ATP1B1, TPM4</i>       |
| miR-197-5p   | 3     | <i>ATP6V0D1, SCARB2, NDUFA2</i>           |
| miR-4270     | 3     | <i>TSC2, MAPK3, VCL</i>                   |
| miR-4646-5p  | 3     | <i>WEE2, TFDP2, ORC5</i>                  |
| miR-4758-5p  | 3     | <i>RPS17, RPS17L, RPS20</i>               |
| miR-1254     | 2     | <i>ADCY7, PHKG2</i>                       |
| miR-3197     | 2     | <i>CTNNBIP1, ESPL1</i>                    |
| miR-3665     | 2     | <i>NT5C, NNT</i>                          |
| miR-4497     | 2     | <i>MCM5, RPS4X</i>                        |
| miR-4534     | 2     | <i>CSF2RA, BMP7</i>                       |
| miR-4655-5p  | 2     | <i>ARHGDI1, YWHAB</i>                     |
| miR-4665-5p  | 2     | <i>MAP3K13, DUSP9</i>                     |
| miR-4674     | 2     | <i>ADCY2, HTR2A</i>                       |
| miR-4689     | 2     | <i>NUDT12, NT5C2</i>                      |
| miR-4734     | 2     | <i>CD38, CUL1</i>                         |
| miR-1228-5p  | 1     | <i>HIST1H4H</i>                           |
| miR-3131     | 1     | <i>ABL1</i>                               |
| miR-3185     | 1     | <i>PTGER3</i>                             |
| miR-3196     | 1     | <i>ABCA2</i>                              |
| miR-345-3p   | 1     | <i>DUSP6</i>                              |
| miR-3610     | 1     | <i>TNFRSF10D</i>                          |
| miR-365a-5p  | 1     | <i>SMAD2</i>                              |
| miR-3937     | 1     | <i>CIQA</i>                               |
| miR-3940-5p  | 1     | <i>SENP2</i>                              |
| miR-3960     | 1     | <i>P2RX4</i>                              |
| miR-4281     | 1     | <i>RPS6KB2</i>                            |
| miR-4486     | 1     | <i>CACNA1A</i>                            |
| miR-4649-5p  | 1     | <i>DDX39B</i>                             |
| miR-4723-5p  | 1     | <i>PIP5K1C</i>                            |
| miR-4730     | 1     | <i>TBLIX</i>                              |
| miR-4745-5p  | 1     | <i>GRIN2A</i>                             |
| miR-4751     | 1     | <i>G6PC</i>                               |
| miR-551b-5p  | 1     | <i>CAMK2D</i>                             |
| miR-744-5p   | 1     | <i>CALML5</i>                             |

\* Modified novel out degree (NOD) calculated by using 122 miRNAs commonly detected in the microarray analysis and entered in the DIANA database, and by using age-related pathways previously reported (Wang, 2012).
